# Supplementary material for: Identification of DNA primase inhibitors via a combined fragment-based and virtual screening
Source: PubMed Central journal article supplement (PMC5090872; doi:10.1038/srep36322), 2016-11-02
Supplement: srep36322-s1.pdf [file srep36322-s1.pdf]

## Supplementary Information

### **Identification of DNA primase inhibitors via a combined fragment-based and virtual screening**

Stefan Ilic<sup>1</sup>, Sabine R. Akabayov<sup>1,2</sup>, Haribabu Arthanari<sup>2</sup>, Gerhard Wagner<sup>2</sup>, Charles C.

Richardson<sup>2</sup> & Barak Akabayov<sup>1\*</sup>

<sup>1</sup> Department of Chemistry, Ben-Gurion University of the Negev, Beer-Sheva, 8410501

Israel

<sup>2</sup> Department of Biological Chemistry and Molecular Pharmacology, Harvard Medical

School, 240 Longwood Ave., Boston, Massachusetts 02115, USA.

\*email: akabayov@bgu.ac.il

## 2H-chromene-3-carbothioamide

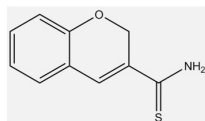

## indole

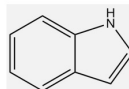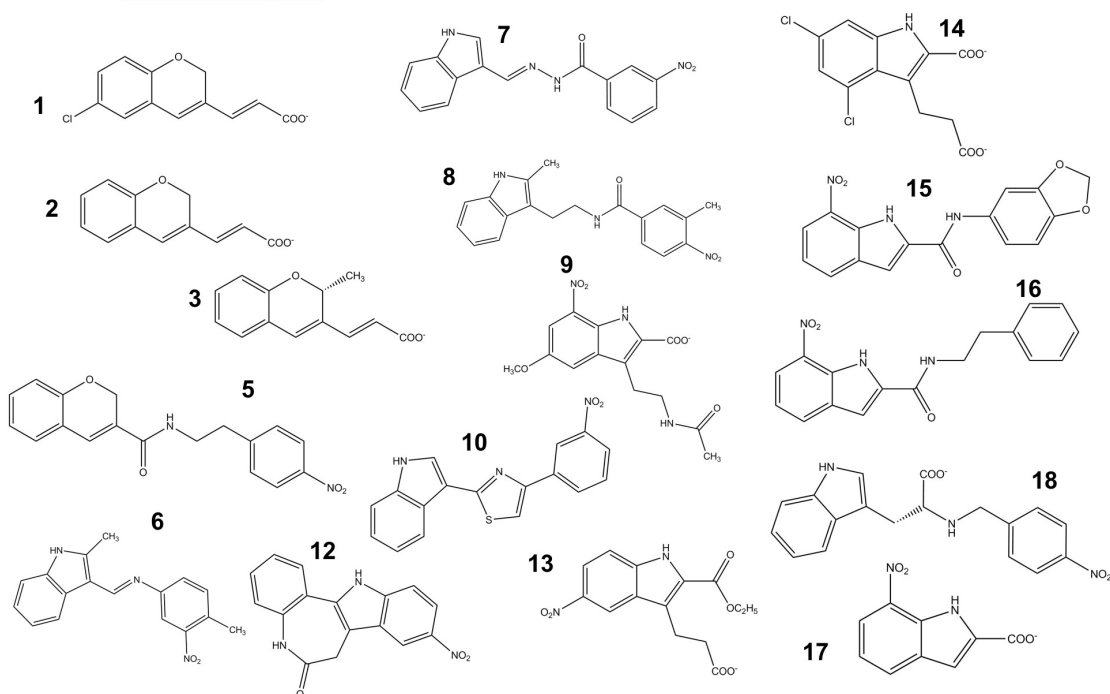

**Figure S1** Chemical structures of 16 small molecules obtained by virtual filtration using the ZINC database<sup>17</sup> and high-throughput docking using AutoDock<sup>18</sup>. The two subsets are based on the scaffolds obtained by STD spectroscopy: 2H-chromene-3-carbothioamide and indole (indicated in grey).

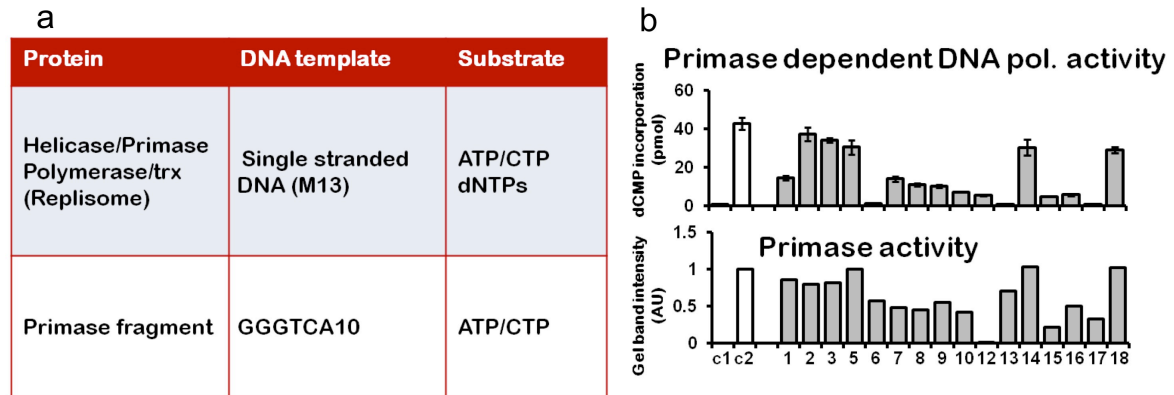

**Figure S2 Inhibitory effect of small molecules on T7 DNA primase activity.** (a) Effect of small molecule inhibitors on primase-dependent DNA synthesis mediated by gp5/trx and gene 4 helicase (gp4A). The standard reaction contained the ssM13 DNA template (10 nM), 0.3 mM dATP, dGTP, dCTP and [ $\alpha$ - $^{32}$ P] dTTP (0.1 mCi), 10 nM gp5/trx, 200 nM monomeric concentrations of gp4B and 250  $\mu$ M of small molecule inhibitors. After incubation for 30 min at 37 °C, the level of RNA synthesis was determined based on the amount of [ $\alpha$ - $^{32}$ P] dTTP incorporated into DNA. (b) Effect of small molecule inhibitors on oligonucleotide synthesis by DNA primase. The standard reaction contained the oligonucleotide 5'-GGGTCA<sub>10</sub>-3 containing the primase recognition sequence, 200 mM [ $\alpha$ - $^{32}$ P]-CTP and ATP, and 250  $\mu$ M small molecule inhibitors in a buffer containing 40 mM Tris-HCl (pH 7.5), 10 mM MnCl<sub>2</sub>, 10 mM DTT and 50 mM potassium glutamate. The quenched samples were loaded onto 25% polyacrylamide sequencing gel containing 3M urea and visualized using autoradiography.
